# Supplementary material for: Performance of the Vitek 2 Advanced Expert System (AES) as a Rapid Tool for Reporting Antimicrobial Susceptibility Testing (AST) in Enterobacterales from North and Latin America
Source: PubMed Central journal article supplement (PMC9927136; doi:10.1128/spectrum.04673-22), 2023-01-16
Supplement: reviewer-comments.pdf [file reviewer-comments.pdf]

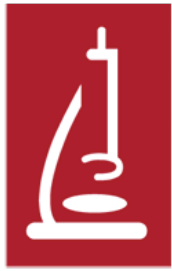

AMERICAN  
SOCIETY FOR  
MICROBIOLOGY

# Microbiology Spectrum

## Performance of the VITEK 2 Advanced Expert System (AES) as a Rapid Tool for Reporting Antimicrobial Susceptibility Testing (AST) in Enterobacterales from North and Latin America

Cecilia Carvalhaes, Dee Shortridge, Leah Woosley, Nabina Gurung, and Mariana Castanheira

*Corresponding Author(s): Cecilia Carvalhaes, JMI Laboratories*

---

### Review Timeline:

Submission Date:

November 15, 2022

Accepted:

December 20, 2022

---

*Editor: Paul Luethy*

*Reviewer(s): Disclosure of reviewer identity is with reference to reviewer comments included in decision letter(s). The following individuals involved in review of your submission have agreed to reveal their identity: Brian Mochon (Reviewer #2)*

### Transaction Report:

(Note: With the exception of the correction of typographical or spelling errors that could be a source of ambiguity, letters and reports are not edited. The original formatting of letters and referee reports may not be reflected in this compilation.)

DOI: <https://doi.org/10.1128/spectrum.04673-22>

December 20, 2022

Dr. Cecilia G Carvalhaes  
JMI Laboratories  
North Liberty, IA 52317

Re: Spectrum04673-22 (Performance of the VITEK 2 Advanced Expert System (AES) as a Rapid Tool for Reporting Antimicrobial Susceptibility Testing (AST) in Enterobacterales from North and Latin America)

Dear Dr. Cecilia G Carvalhaes:

Your manuscript has been accepted, and I am forwarding it to the ASM Journals Department for publication. You will be notified when your proofs are ready to be viewed.

The ASM Journals program strives for constant improvement in our submission and publication process. Please tell us how we can improve your experience by taking this quick [Author Survey](#).

As an open-access publication, Spectrum receives no financial support from paid subscriptions and depends on authors' prompt payment of publication fees as soon as their articles are accepted. You will be contacted separately about payment when the proofs are issued; please follow the instructions in that e-mail. Arrangements for payment must be made before your article is published. For a complete list of **Publication Fees**, including supplemental material costs, please visit our [website](#).

ASM policy requires that data be available to the public upon online posting of the article, so please verify all links to sequence records, if present, and make sure that each number retrieves the full record of the data. If a new accession number is not linked or a link is broken, provide production staff with the correct URL for the record. If the accession numbers for new data are not publicly accessible before the expected online posting of the article, publication of your article may be delayed; please contact the ASM production staff immediately with the expected release date.

Corresponding authors may [join or renew ASM membership](#) to obtain discounts on publication fees. Need to upgrade your membership level? Please contact Customer Service at [Service@asmusa.org](mailto:Service@asmusa.org).

Thank you for submitting your paper to Spectrum.

Sincerely,

Paul Luethy  
Editor, Microbiology Spectrum

Journals Department  
American Society for Microbiology  
1752 N St., NW  
Washington, DC 20036  
E-mail: [spectrum@asmusa.org](mailto:spectrum@asmusa.org)

Performance of the VITEK 2 Advanced Expert System (AES) as a Rapid Tool for Reporting Antimicrobial susceptibility Testing (AST) in Enterobacterales from North and Latin America

A comprehensive evaluation of the performance of the VITEK 2 AES confidence level dispositions as well as accuracy compared to BMD. Furthermore, it provides an updated look at this particular ES system performance since the emergence of various resistance mechanisms using an interesting mix of isolates. This study characterizes and categorizes isolates with elevated MICs by their resistance genotypes obtained by WGS. This paper only focused on B-lactam drugs for Enterobacterales isolates displaying variety of B lactamases. The paper was clear and straightforward and data heavy consisting primarily of tables to display the data in a digestible format. The main weakness is addressed by the author in that comparison are largely done using CLSI CA, EA and error rates recommendations in the evaluation, despite the recommendations being established for routinely encountered isolates in a clinical setting. Otherwise, a nice comprehensive update of the performance of the AES system in question against some challenging isolates. Criticism based really on the labeling of tables.

Table 2 – line 438- has the abbreviation for not calculable (NC), but this is not in Table 2.

Need consistency with nomenclature rules- some places “Enterobacterales” is italicized but not always.

Not sure why Tables 4-6 have abbreviation key for ME and VME when it was used in earlier tables that did not have this key.
