# Supplementary material for: Performance of the Vitek 2 Advanced Expert System (AES) as a Rapid Tool for Reporting Antimicrobial Susceptibility Testing (AST) in Enterobacterales from North and Latin America
Source: PubMed Central journal article supplement (PMC9927136; doi:10.1128/spectrum.04673-22), 2023-01-16
Supplement: spectrum.04673-22-s0001.pdf [file spectrum.04673-22-s0001.pdf]

Supplemental Material

Table S1. Distribution of *Enterobacterales* isolates by species and organism source

| <i>Enterobacterales</i> species / group     | SENTRY<br>Surveillance<br>Program | CDC AR Bank |
|---------------------------------------------|-----------------------------------|-------------|
| <i>Citrobacter freundii</i>                 | 1                                 | 2           |
| <i>Citrobacter freundii</i> species complex | 19                                |             |
| <i>Citrobacter koseri</i>                   | 11                                | 2           |
| <i>Enterobacter cloacae</i>                 | 0                                 | 9           |
| <i>Enterobacter cloacae</i> species complex | 61                                | 2           |
| <i>Escherichia coli</i>                     | 111                               | 23          |
| <i>Klebsiella aerogenes</i>                 | 6                                 | 2           |
| <i>Klebsiella oxytoca</i>                   | 16                                | 2           |
| <i>Klebsiella pneumoniae</i>                | 130                               | 47          |
| <i>Kluyvera ascorbata</i>                   | 0                                 | 1           |
| <i>Morganella morganii</i>                  | 3                                 | 2           |
| <i>Pluralibacter gergoviae</i>              | 1                                 |             |
| <i>Proteus mirabilis</i>                    | 14                                | 4           |
| <i>Providencia rettgeri</i>                 | 4                                 | 1           |
| <i>Providencia stuartii</i>                 | 3                                 |             |
| <i>Serratia marcescens</i>                  | 27                                | 9           |
| <b>Total</b>                                | <b>407</b>                        | <b>106</b>  |

Table S2. Distribution of *Enterobacterales* isolates by geographic region

| <b>Continent/country</b> | <b>no. of isolates</b> |
|--------------------------|------------------------|
| <b>Latin America</b>     | <b>123</b>             |
| Argentina                | 34                     |
| Brazil                   | 33                     |
| Chile                    | 24                     |
| Guatemala                | 1                      |
| Mexico                   | 29                     |
| Venezuela                | 2                      |
| <b>North America</b>     | <b>284</b>             |
| USA                      | 284                    |
| <b>Unknown</b>           | <b>106</b>             |
| CDC bank                 | 106                    |
| <b>Total</b>             | <b>513</b>             |
